# Supplementary material for: Characterization of Resistance in Gram-Negative Urinary Isolates Using Existing and Novel Indicators of Clinical Relevance: A 10-Year Data Analysis
Source: PubMed Central journal article supplement (PMC7175163; doi:10.3390/life10020016), 2020-02-11
Supplement: life-10-00016-s001.pdf [file life-10-00016-s001.pdf]

# Characterization of resistance in Gram-negative urinary isolates using existing and novel indicators of clinical relevance: a 10-year data analysis

Márió Gajdács<sup>1\*</sup>, Zoltán Bátori<sup>2</sup>, Marianna Ábrók<sup>3</sup>, Andrea Lázár<sup>3</sup>, Katalin Burián<sup>3,4</sup>

<sup>1</sup> Department of Pharmacodynamics and Biopharmacy, Faculty of Pharmacy, University of Szeged; 6720 Szeged, Eötvös utca 6., Hungary

<sup>2</sup> Department of Ecology, Faculty of Sciences, University of Szeged; 6726 Szeged, Közép fasor 52., Hungary; [zbatory@gmail.com](mailto:zbatory@gmail.com) (Z.B.)

<sup>3</sup> Institute of Clinical Microbiology, Faculty of Medicine, University of Szeged; 6725 Szeged, Semmelweis utca 6., Hungary; [abrok.marianna@med.u-szeged.hu](mailto:abrok.marianna@med.u-szeged.hu) (M.A.), [lazar.andrea@med.u-szeged.hu](mailto:lazar.andrea@med.u-szeged.hu) (A.L.)

<sup>4</sup> Department of Medical Microbiology and Immunobiology, Faculty of Medicine, University of Szeged; 6720 Szeged, Dóm tér 10., Hungary; [burian.katalin@med.u-szeged.hu](mailto:burian.katalin@med.u-szeged.hu) (K.B.)

\* Correspondence: [gajdacs.mario@pharm.u-szeged.hu](mailto:gajdacs.mario@pharm.u-szeged.hu); Tel: +36-62-341-330 (M.G.)

**Abbreviation list:** CES: *Citrobacter-Enterobacter-Serratia*; DTR: difficult-to-treat resistance; mDTR: modified difficult-to-treat resistance; mcDTR: modified difficult-to-treat resistance for *Escherichia coli*; MDR: multidrug-resistance; n.s.: not significant; NFGNB: non-fermenting Gram-negative bacteria; PDR: pandrug resistance; SXT: sulfamethoxazole-trimethoprim; UDR: usual drug resistance; Wt: wild-type; XDR: extensive drug resistance

**Supplementary Table S1.** Distribution of *Escherichia coli* isolates among different resistance categories,

| 2008-2017                                |                     |                    |            |
|------------------------------------------|---------------------|--------------------|------------|
| Resistance category                      | Outpatient isolates | Inpatient isolates | Statistics |
| Wt/susceptible                           | 39.4%               | 34.1%              | n.s.       |
| UDR                                      | 60.6%               | 55.9%              | n.s.       |
| mDTR                                     | 0.8%                | 2.2%               | $p=0.043$  |
| mcDTR                                    | 0.6%                | 1.9%               | $p=0.04$   |
| MDR                                      | 0.2%                | 3.4%               | $p=0.018$  |
| DTR                                      | 0.01%               | 0.01%              | n.s.       |
| XDR                                      | 0%                  | 0%                 | -          |
| PDR                                      | 0%                  | 0%                 | -          |
| Highest ratio of resistant isolates for: | Ciprofloxacin       | Ciprofloxacin      | -          |

Supplementary material S1

Supplementary Table S2. Distribution of *Klebsiella* spp. isolates among different resistance categories,

| 2008-2017                                       |                     |                    |            |
|-------------------------------------------------|---------------------|--------------------|------------|
| Resistance category                             | Outpatient isolates | Inpatient isolates | Statistics |
| Wt/susceptible                                  | 40.4%               | 45.7%              | n.s.       |
| UDR                                             | 59.6%               | 54.3%              | n.s.       |
| mDTR                                            | 0.4%                | 5.9%               | $p=0.011$  |
| MDR                                             | 0.3%                | 2.7%               | $p=0.028$  |
| DTR                                             | 0.2%                | 0.3%               | n.s.       |
| XDR                                             | 0.1%                | 0.1%               | n.s.       |
| PDR                                             | 0%                  | 0%                 | -          |
| <b>Highest ratio of resistant isolates for:</b> | Ciprofloxacin       | SXT                | -          |

Supplementary Table S3. Distribution of *Citrobacter-Enterobacter-Serratia* (CES) isolates among different resistance categories, 2008-2017

| Resistance category                             | Outpatient isolates | Inpatient isolates | Statistics |
|-------------------------------------------------|---------------------|--------------------|------------|
| Wt/susceptible                                  | 14.0%               | 10.1%              | n.s.       |
| UDR                                             | 86.0%               | 89.9%              | n.s.       |
| mDTR                                            | 5.5%                | 17.0%              | $p=0.009$  |
| MDR                                             | 2.0%                | 8.3%               | $p=0.016$  |
| DTR                                             | 1.2%                | 1.9%               | n.s.       |
| XDR                                             | 0%                  | 0.2%               | n.s.       |
| PDR                                             | 0%                  | 0%                 | -          |
| <b>Highest ratio of resistant isolates for:</b> | Ciprofloxacin       | SXT                | -          |

Supplementary Table S4. Distribution of *Proteus-Providencia-Morganella* isolates among different resistance categories, 2008-2017

| Resistance category                             | Outpatient isolates | Inpatient isolates | Statistics |
|-------------------------------------------------|---------------------|--------------------|------------|
| Wt/susceptible                                  | 31.8%               | 22.2%              | $p=0.036$  |
| UDR                                             | 68.2%               | 77.8%              | $p=0.034$  |
| mDTR                                            | 13.5%               | 22.9%              | $p=0.02$   |
| MDR                                             | 7.6%                | 10.3%              | $p=0.047$  |
| DTR                                             | 0%                  | 0.2%               | n.s.       |
| XDR                                             | 0%                  | 0%                 | n.s.       |
| PDR                                             | 0%                  | 0%                 | -          |
| <b>Highest ratio of resistant isolates for:</b> | SXT                 | SXT                | -          |

Supplementary material S1

Supplementary Table S5. Distribution of *Pseudomonas aeruginosa* isolates among different resistance categories, 2008-2017

| Resistance category                        | Outpatient isolates | Inpatient isolates | Statistics |
|--------------------------------------------|---------------------|--------------------|------------|
| Wt/susceptible                             | 52.6%               | 45.0%              | n.s.       |
| UDR                                        | 47.3%               | 55.0%              | n.s.       |
| MDR                                        | 6.8%                | 11.4%              | $p=0.028$  |
| DTR                                        | 5.3%                | 8.6%               | $p=0.042$  |
| XDR                                        | 0.8%                | 2.9%               | $p=0.049$  |
| PDR                                        | 0%                  | 0%                 | -          |
| <b>Highest ratio of resistant isolates</b> | Ciprofloxacin       | Levofloxacin       | -          |

Supplementary Table S6. Distribution of *Acinetobacter* spp. isolates among different resistance categories, 2008-2017

| Resistance category                        | Outpatient isolates | Inpatient isolates | Statistics |
|--------------------------------------------|---------------------|--------------------|------------|
| Wt/susceptible                             | 45.5%               | 11.1%              | $p<0.001$  |
| UDR                                        | 54.5%               | 88.9%              | $p<0.001$  |
| mDTR                                       | 11.4%               | 22.6%              | $p=0.018$  |
| MDR                                        | 7.2%                | 13.3%              | $p=0.02$   |
| DTR                                        | 5.0%                | 11.7%              | $p=0.024$  |
| XDR                                        | 2.6%                | 8.8%               | $p=0.036$  |
| PDR                                        | 0%                  | 0%                 | -          |
| <b>Highest ratio of resistant isolates</b> | SXT                 | SXT                | -          |
